# Supplementary material for: Novel Candidate Genes Differentially Expressed in Glyphosate-Treated Horseweed (Conyza canadensis)
Source: MDPI journal article supplement (doi:10.3390/genes12101616), 2021-10-14
Supplement: s1 [file s1]

Table S1. Primers of the randomly selected genes from RNA-seq data for validation of RNA-seq analysis by RT-qPCR.

| Contig ID             | Orientation | Sequence (5'-3')             |
|-----------------------|-------------|------------------------------|
| TRINITY_DN310_c0_g1   | Forward     | GGAGTGTGGGACAAAGGCAACTTC     |
|                       | Reverse     | TGCATACCCTGCATCAATGACTAAAACC |
| TRINITY_DN4460_c0_g1  | Forward     | TGACCGTTCTCAAGCACAGAATTTCG   |
|                       | Reverse     | GGTCTCAGAGGGAGGGGAGAAT       |
| TRINITY_DN1752_c0     | Forward     | GTGCGGGAAGAGCTCTGTAATCG      |
|                       | Reverse     | GGTGGCGGCTTCTATGATCTCG       |
| TRINITY_DN11995_c0_g1 | Forward     | CGAGTCTGCTCAGGGAAAACGAC      |
|                       | Reverse     | CGAACCTGAACCCCCTGATACC       |
| TRINITY_DN9863_c0_g   | Forward     | CAAGGATCTTTTGATGGCAGGAACAGC  |
|                       | Reverse     | GTCAGCTGAACTCCTGGTAGGC       |
| TRINITY_DN17441_c0_g1 | Forward     | GCCGCGATATCTGAGGGATTACG      |
|                       | Reverse     | CCATCGTTCGGGTCTAAAAACACGAC   |
| TRINITY_DN672_c0_g1   | Forward     | GAGCGGATCCCAGAACGTATTGTTC    |
|                       | Reverse     | GTCTCTGATTGTTTCAGGGCTTCC     |
| TRINITY_DN7231_c0_g1  | Forward     | GGAGAGCATCACCGTGGTTATGTTG    |
|                       | Reverse     | CCTGGTTGCATGGATTCCCAGAAG     |
| Tubulin               | Forward     | AGCAATAGTGCATGGGGTTCTCG      |
|                       | Reverse     | CTCACGTTTAGCAGCTCTGCTTTG     |
