# Supplementary material for: Novel Candidate Genes Differentially Expressed in Glyphosate-Treated Horseweed (Conyza canadensis)
Source: MDPI journal article supplement (doi:10.3390/genes12101616), 2021-10-14
Supplement: s1 [file s1]

Table S3. Validation of differential expressed genes of TNRG vs TNRC and TNSG vs TNSC in RNA-seq analysis with RT-qPCR. Tubulin gene was used as an internal control for normalization for RT-qPCR data analysis. The ratio of relative gene expression (R.E.) was determined by  $2^{-\Delta\Delta Ct}$  equation. For RT-qPCR, three technical replicates of three glyphosate- or water sprayed horseweed leaves were used for analysis (\* p-value <0.05 , \*\* p-value <0.01). The significance of F.C. of RNA-seq indicated FDR (\*\* FDR < 0.01).

| Contig ID             | TNRG vs TNRC         |                     | TNSG vs TNSC        |                     |
|-----------------------|----------------------|---------------------|---------------------|---------------------|
|                       | FC of RNA-seq (log2) | RE of RT-qPCR(log2) | FC of RNA-seq(log2) | RE of RT-qPCR(log2) |
| TRINITY_DN310_c0_g2   | 4.3**                | 5.2**               | 4.2**               | 3.5**               |
| TRINITY_DN4460_c0_g1  | 1.9**                | 1.1*                | 1.4**               | 1.7**               |
| TRINITY_DN9863_c0_g1  | 1.2**                | 1.3*                | 1.1**               | 1.7*                |
| TRINITY_DN7231_c0_g1  | -0.7**               | 1.0                 | -1.1**              | 0.4                 |
| TRINITY_DN1752_c0_g1  | -1.2**               | -0.2                | -1.1**              | 0.6                 |
| TRINITY_DN17441_c0_g1 | -1.7**               | -2.8*               | -1.7**              | -1.8*               |
| TRINITY_DN672_c0_g1   | -1.7**               | -1.9*               | -0.7**              | 0.8                 |
| TRINITY_DN11995_c0_g1 | -2.0**               | 0.2                 | -1.3**              | 0.7                 |
