# Supplementary material for: Novel Candidate Genes Differentially Expressed in Glyphosate-Treated Horseweed (Conyza canadensis)
Source: MDPI journal article supplement (doi:10.3390/genes12101616), 2021-10-14

a

| Contig ID             | TNRG vs TNRC |         | TNSG vs TNSC |       | Protein accession no. | Description                                       |
|-----------------------|--------------|---------|--------------|-------|-----------------------|---------------------------------------------------|
|                       | log FC       | FDR     | log FC       | FDR   |                       |                                                   |
| TRINITY_DN27451_c0_g1 | 3.3          | 2.3E-09 | 2.4          | 7E-30 | PWA94409.1            | Hypothetical protein CTI12_AA062430               |
| TRINITY_DN6162_c0_g1  | 3.3          | 4.2E-04 | 3.0          | 8E-37 | PWA81817.1            | TMV resistance protein N                          |
| TRINITY_DN30253_c0_g1 | 4.5          | 3.3E-10 | 3.8          | 2E-46 | XP_023764785.1        | Protein ALP1-like                                 |
| TRINITY_DN4356_c0_g2  | 4.9          | 2.4E-13 | 4.0          | 2E-38 | XP_022012719.1        | Wall-associated receptor kinase-like 2 isoform X2 |
| TRINITY_DN20700_c0_g1 | 2.3          | 3.4E-06 | 2.6          | 3E-24 | XP_024991351.1        | Phosphoenolpyruvate carboxylase kinase 2-like     |
| TRINITY_DN25233_c0_g1 | 2.6          | 1.5E-04 | 3.1          | 7E-28 | PWA85832.1            | Hypothetical protein CTI12_AA146110               |

b

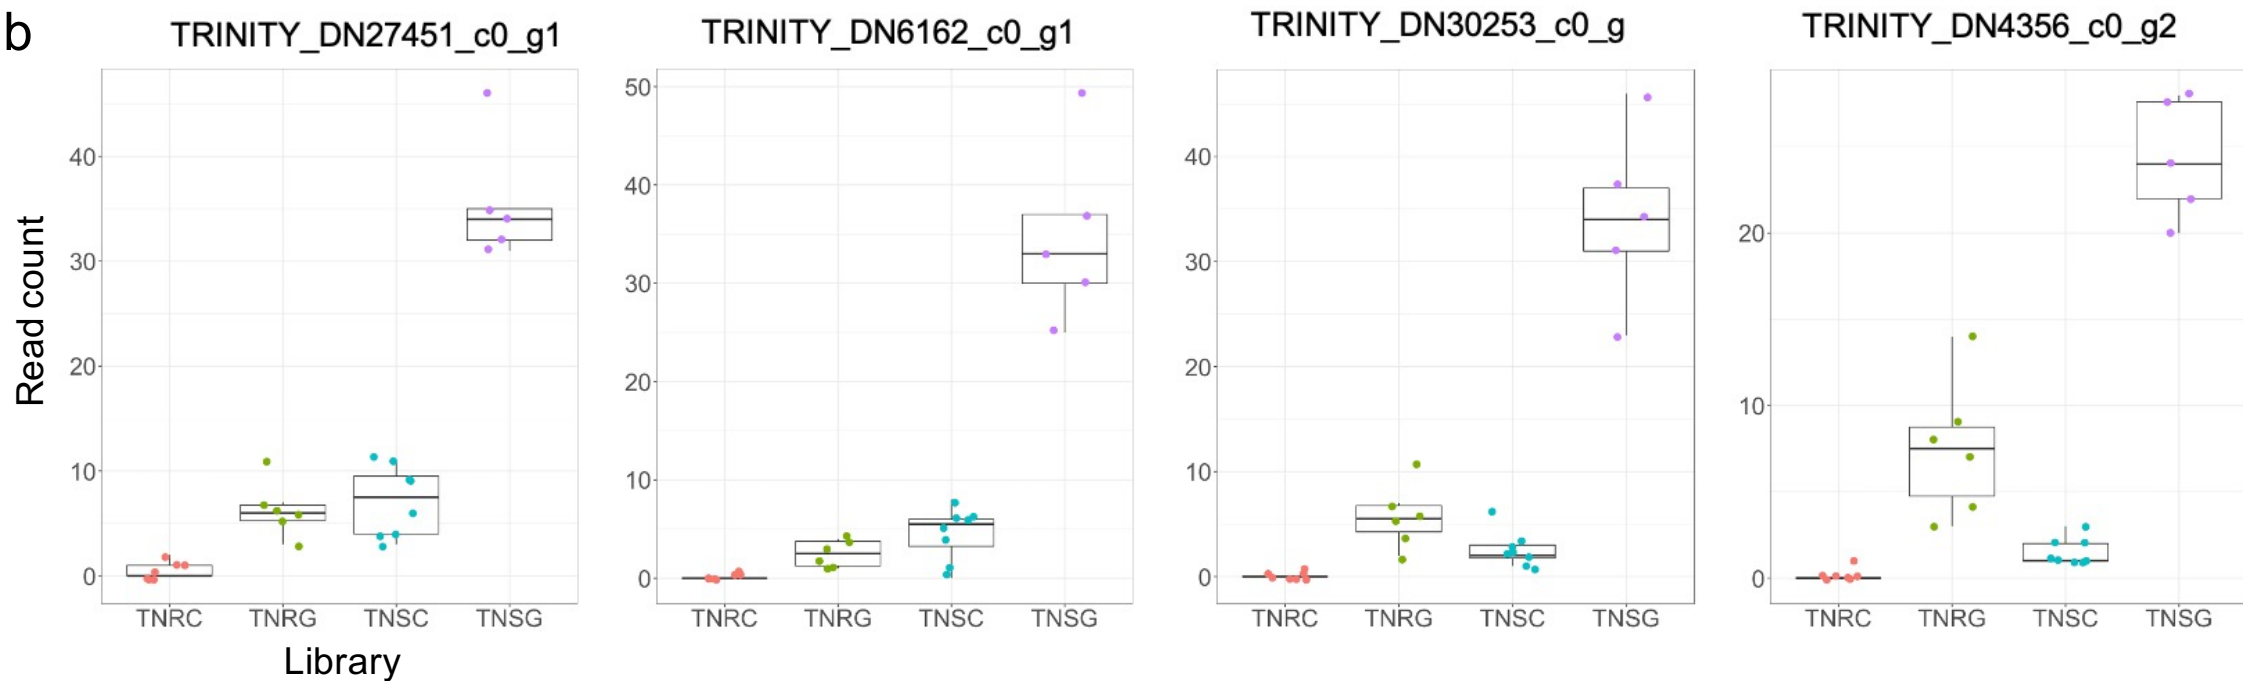

Supplement: s1 [file s1]
