# Supplementary figures and images for: Novel Candidate Genes Differentially Expressed in Glyphosate-Treated Horseweed (Conyza canadensis)
Source: MDPI journal article supplement (doi:10.3390/genes12101616), 2021-10-14

0.84kg acid equivalent ha<sup>-1</sup>  
Round-up WeatherMax,  
24 h after spray

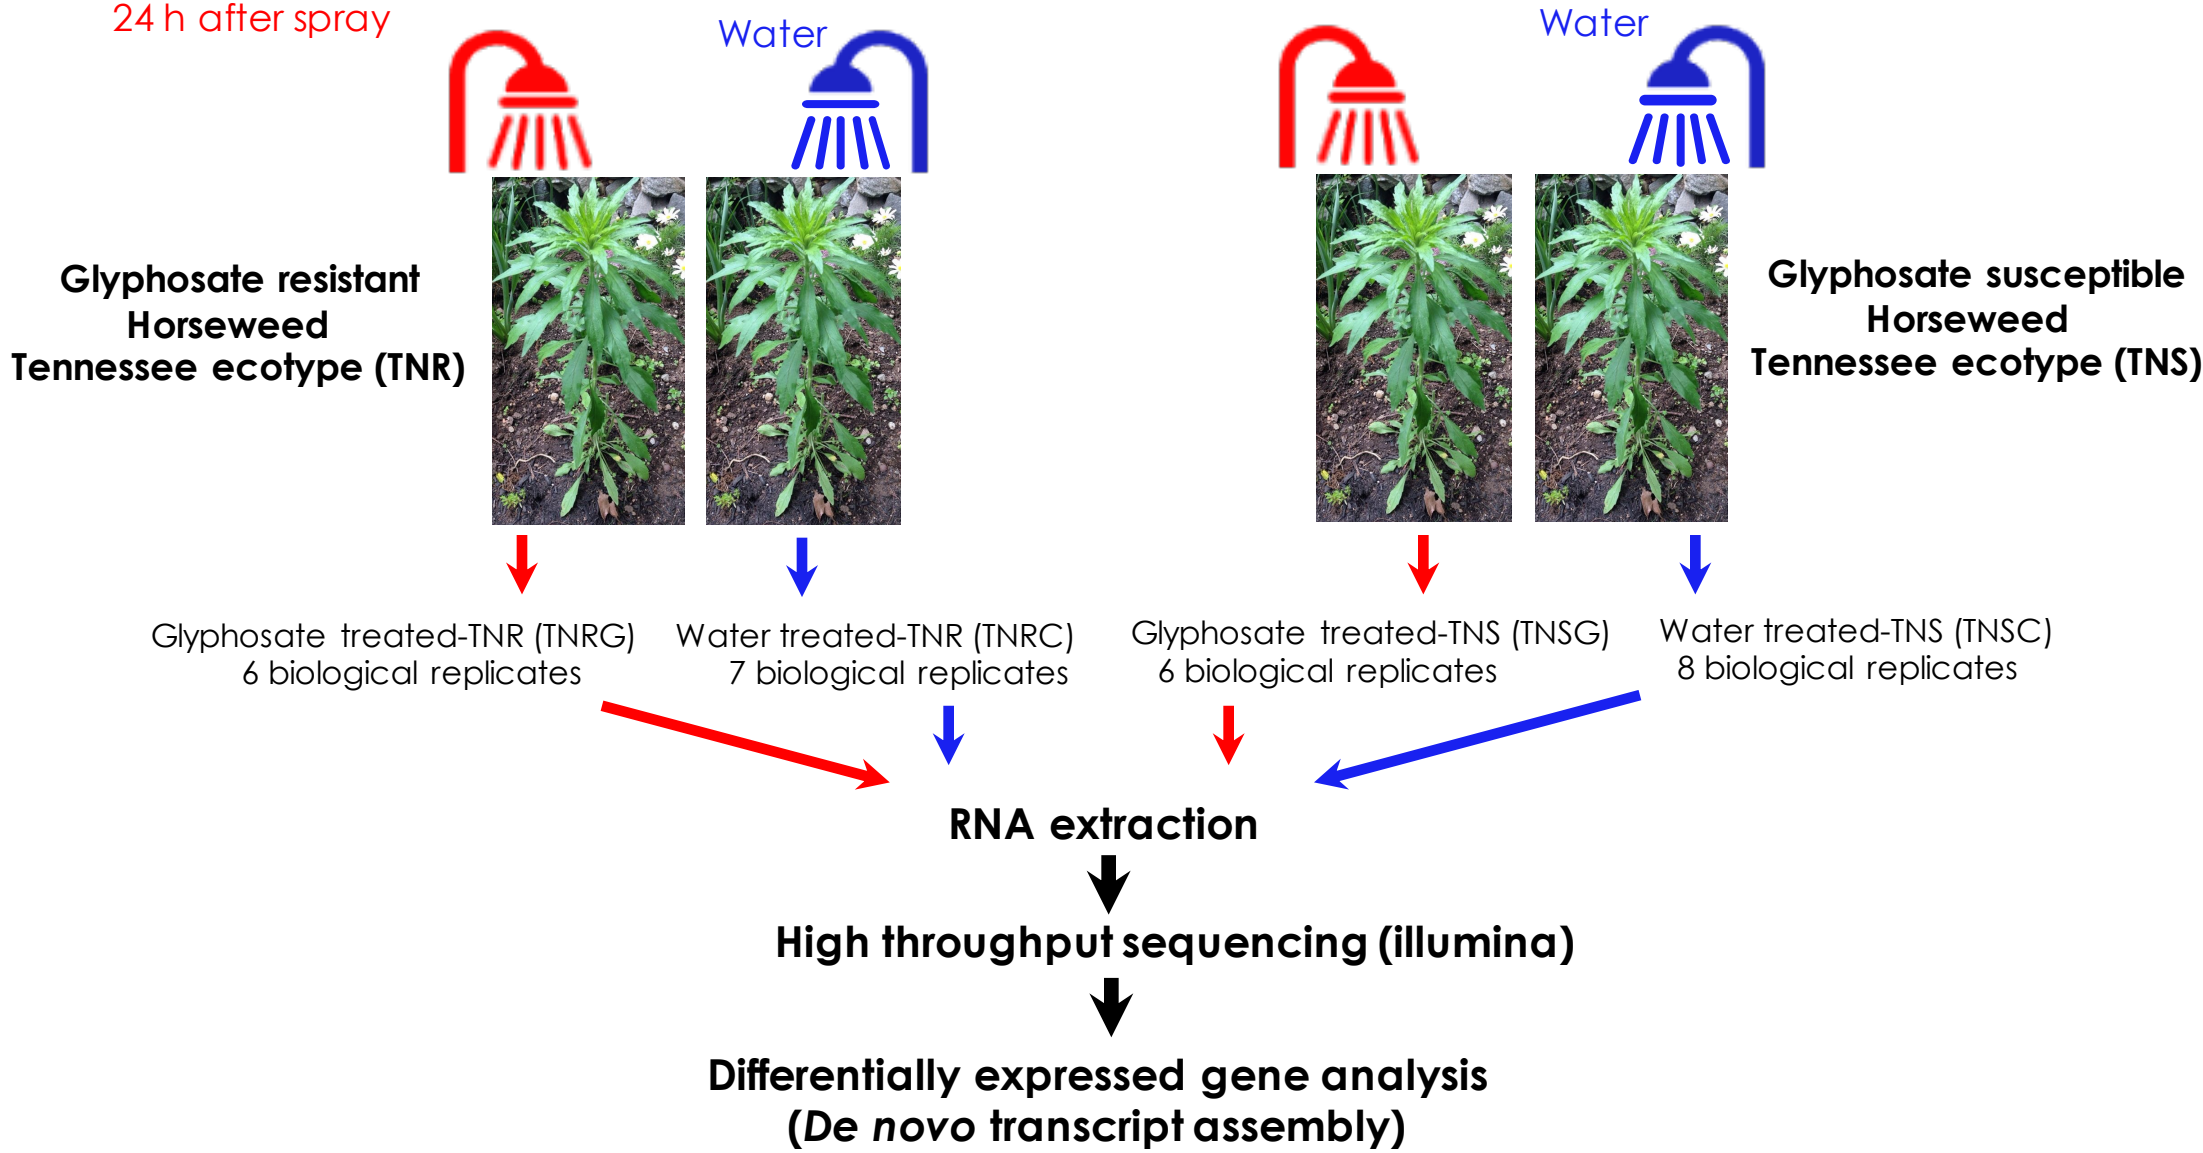

Supplement: s1 [file s1]
